# Supplementary material for: The Impact of Climate Risk on Corporate Digital Transformation: Evidence from Chinese Listed Companies
Source: Research Square preprint supplement (doi:10.21203/rs.3.rs-5778476/v1), 2025-04-28
Supplement: Supplementary file 1 [file 4fa12cd9e37eb4bc557a6ab7.docx]

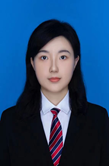


Xue Chang is a lecturer at Shenzhen City Polytechnic (Shenzhen institute of technology) and holds a PhD degree from the Business School of the University of Nottingham Ningbo China. Her research interests cover corporate governance, finance, and accounting. In 2022, she also volunteered in the fight against the COVID-19 pandemic. Email: 350471682@qq.com Address: No. 1, Jiangjunmao Road, Wulian Community, Longgang Street, Longgang District, Shenzhen City, Guangdong Province, China. Postal Code: 518000.

1.变革中的商业银行财务管理若干问题探究[J].常雪. 商业会计.2018(24)

2. Chang, X. (2022). Impact of risks on forced CEO turnover. Quantitative Finance and Economics, 6(2), 177-205. doi:10.3934/qfe.2022008

3. Wu, B., An, X., Sun, W., Chang, X., Su, H., & Jiang, S. (2022). Construction of a Recommendation Method for Financial Insurance Products Based on Machine Learning. Mathematical Problems in Engineering, 2022, 1-7. doi:10.1155/2022/6234947

4. Chang X. (2022). The Impact of Comment Letters on Forced CEO Turnover. International Journal of Entrepreneurship, 26(S5), 1-25.

5. Chang X.(2022). The Impact of Tax Outcomes on Forced CEO Turnover. National Accounting Review. incoming.
