# Supplementary material for: The Impact of Climate Risk on Corporate Digital Transformation: Evidence from Chinese Listed Companies
Source: Research Square preprint supplement (doi:10.21203/rs.3.rs-5778476/v1), 2025-04-28
Supplement: Supplementary file 2 [file aa2fcb1b7a496d87e30a07a0.docx]

Data availability

The data described in this Data Note can be accessed on China Stock Market & Accounting Research Database (CSMAR) and Chinese Research Data Services Platform (CNRDS). The main variable Climate risk is followed Nagar and Schoenfeld (2024), enterprise digital transformation are followed Cheng et al., 2024. The datasets generated during and/or analyzed during the current study are available from the corresponding author on reasonable request.

Reference

Nagar, V., & Schoenfeld, J. (2024). Measuring weather exposure with annual reports. Review of Accounting Studies, 29(1), 1–32. <https://doi.org/10.1007/s11142-022-09711-2>

Cheng, W., Li, C., & Zhao, T. (2024). The stages of enterprise digital transformation and its impact on internal control: Evidence from China. International Review of Financial Analysis, 92(4), 103079. https://doi.org/10.1016/j.irfa.2024.103079
